# Supplementary material
Source: PubMed Central journal article supplement (PMC6890491)
Supplement: 2019-0068_original_submission.pdf [file 2019-0068_original_submission.pdf]

1  
2  
3 **The hepatitis C virus (HCV) cascade of care in a Canadian provincial prison:**  
4  
5 **A retrospective cohort study with important implications for HCV micro-elimination**  
6  
7  
8  
9  
10  
11

12 Nadine Kronfli<sup>1,2</sup> MD MPH, Camille Dussault<sup>2</sup> MScPH, Marina B Klein<sup>1,2</sup> MD MSc, Bertrand  
13  
14 Lebouché<sup>1,2</sup> MD PhD, Giada Sebastiani<sup>1,2</sup> MD and Joseph Cox<sup>1,2</sup> MD MSc  
15  
16  
17  
18  
19  
20

21 <sup>1</sup>Department of Medicine, Division of Infectious Diseases and Chronic Viral Illness Service,  
22  
23 McGill University, Montreal, Quebec, Canada  
24  
25

26 <sup>2</sup>Research Institute of the McGill University Health Centre, Montreal, Quebec, Canada  
27  
28  
29  
30  
31  
32

33 **Address correspondence to:**  
34

35 Nadine Kronfli  
36

37 Division of Infectious Diseases and Chronic Viral Illness Service  
38

39 McGill University Health Centre – Glen site  
40

41 1001 Decarie Boulevard D02.4110  
42  
43

44 Montreal, Quebec, Canada. H4A 3J1  
45

46 Telephone: (514) 934-1934  
47  
48

49 Email: nadine.kronfli@mcgill.ca  
50  
51  
52  
53

54 **Word count: 2,700~~662~~**  
55  
56  
57  
58  
59  
60

## Abstract

**Background:** Hepatitis C virus (HCV) micro-elimination efforts must target people in prison; however, the HCV care cascade has never been assessed in Canadian correctional facilities. We characterized the HCV care cascade in Quebec's largest provincial prison.

**Methods:** We conducted a retrospective study of all HCV-related laboratory tests requested at l'Établissement de Détenation de Montréal between July 1, 2017 and June 30, 2018. We defined eight cascade steps: 1) total sentenced inmates; 2) HCV screened (via HCV-antibody); 3) HCV-antibody positive; 4) HCV RNA tested; 5) HCV RNA positive; 6) linked to care; 7) initiated HCV treatment; and 8) achieved sustained virologic response (SVR). Proportions of inmates at each step were measured using denominator-numerator linkage. The proportion screened among inmates sentenced for at least one month, during which time screening should be feasible, was also calculated.

**Results:** Of the 4931 sentenced inmates, 344 (7%) were screened for HCV, 38 (11%) were HCV-antibody positive, 35 (92%) received HCV RNA testing, 16 (46%) were HCV RNA positive, 10 (63%) were linked to care, three (30%) initiated treatment, and two (67%) achieved SVR. Among inmates sentenced for one month (n=1972), the proportion screened increased to 17%.

**Interpretation:** Our findings confirm that a very small proportion (7%) of men at a Canadian provincial prison were screened using on-demand HCV testing ~~and that, while screening was the major rate-limiting step,~~ treatment initiation was low in the absence of formal HCV cure

1  
2  
3 pathways. To eliminate HCV in this sub-population, adopting opt-out HCV testing should be  
4  
5 considered a necessary first step.  
6  
7  
8  
9  
10  
11  
12  
13  
14  
15  
16  
17  
18  
19  
20  
21  
22  
23  
24  
25  
26  
27  
28  
29  
30  
31  
32  
33  
34  
35  
36  
37  
38  
39  
40  
41  
42  
43  
44  
45  
46  
47  
48  
49  
50  
51  
52  
53  
54  
55  
56  
57  
58  
59  
60

Confidential

## Introduction

Hepatitis C virus (HCV) is the leading cause of cirrhosis, hepatocellular carcinoma, and transplantation, and in Canada, causes more years of life lost than any other infectious disease.<sup>1-4</sup> Provided that highly effective direct-acting antiviral treatment can be expanded, HCV-related sequelae will likely become less frequent over time. Unfortunately, this may not be the case for people experiencing incarceration, who are known to suffer from lower rates of HCV treatment uptake in Canada despite a 40-fold greater HCV-antibody prevalence (indicating previous exposure) compared to the general population.<sup>5-7</sup> Access to direct-acting antivirals for those currently or previously incarcerated would not only have individual-level benefits, but could potentially decrease onward transmission in these highly mobile populations where harm reduction interventions are not necessarily available. Decreased treatment uptake among inmates is multifactorial. At the system-level, it is likely due to absent systematic screening programs in most provincial correctional facilities, resulting in fewer identified cases, as well as a lack of standardized procedures needed to facilitate treatment uptake during incarceration or linkage to HCV care following release for inmates whose sentences are too short to complete treatment during incarceration.<sup>8,9</sup> While Canada is committed to eliminating HCV by 2030, in failing to address the HCV epidemic among people in Canadian provincial prisons – where the majority of Canadian inmates are serving sentences – Canada will never reach this goal.<sup>10,11</sup>

The HCV cascade of care describes successive health care steps specific to chronic HCV infection that result in optimal health outcomes.<sup>12</sup> Screening, the first step of the cascade, lays the foundation for subsequent linkage to care, initiation of treatment, and achievement of cure. Although the Canadian Task Force on Preventive Health Care, the Canadian Association for the Study of the Liver, the Canadian Network on Hepatitis C, and the World Health Organization

1  
2  
3 recommend HCV screening for *all people who experience imprisonment*, with the exception of  
4  
5 British Columbia, all provincial correctional facilities provide testing only upon request.<sup>13-16</sup>  
6  
7 Furthermore, the recently released “Blueprint to inform HCV elimination efforts in Canada”  
8  
9 stipulates that either HCV treatment and/or linkage to care upon release for those with shorter  
10  
11 sentences be provided to all inmates.<sup>15</sup> Federal inmates, who have been sentenced to time in  
12  
13 custody of two years or more, can progress from screening to cure during incarceration.<sup>17</sup>  
14  
15 However, as a result of shorter sentences in provincial prisons (median: 28 days), achieving all  
16  
17 cascade steps prior to release can be challenging for provincial inmates.<sup>18</sup> Therefore, while some  
18  
19 inmates may qualify for treatment in provincial prisons, treatment may not be routinely  
20  
21 provided.<sup>9</sup> The HCV cascade of care has never been assessed in Canadian provincial correctional  
22  
23 facilities. We aimed to characterize the HCV cascade of care among people in Quebec’s largest  
24  
25 provincial prison, l’Établissement de Détention de Montréal.  
26  
27  
28  
29  
30  
31  
32

## 33 **Methods**

### 34 *Setting*

35  
36 L’Établissement de Détention de Montréal, also known as Bordeaux, is the largest of 17  
37  
38 provincial prisons in Quebec, with a maximum capacity of 1,357 male adults (over the age of 18  
39  
40 years).<sup>19</sup> In Quebec, the Ministry of Health is responsible for the majority of provincial prion-  
41  
42 based nursing services. At L’Établissement de Détention de Montréal, Ministry of Health nurses  
43  
44 are mandated to screen and treat sexually transmitted and bloodborne infections, including HCV.  
45  
46 “On demand” HCV screening, that is, testing requested by inmates, is available at the majority of  
47  
48 provincial prisons in Quebec, including L’Établissement de Détention de Montréal . HCV  
49  
50 antibody and RNA tests are performed via venipuncture, with estimated turnaround times of 24  
51  
52  
53  
54  
55  
56  
57  
58  
59  
60

1  
2  
3 hours and 21 days, respectively at L'Établissement de Détention de Montréal (Joelle Bianco,  
4 Ministry of Health nurse, Centre Intégré Universitaire de Santé et de Services Sociaux du Nord-  
5 de l'Île-de-Montréal; personal communication, March 25, 2019). Confirmatory testing for  
6 chronic HCV infection via HCV RNA is attempted on all inmates who are HCV antibody  
7 positive. All inmates with chronic HCV are offered liver disease assessments by off-site HCV  
8 care providers prior to treatment initiation and are systematically informed of treatment options  
9 as part of routine post-test counselling; there are no on-site physicians with HCV expertise at  
10 L'Établissement de Détention de Montréal. Direct-acting antivirals may be initiated for  
11 inmates who serve greater than 12-week sentences to ensure that treatment is completed during  
12 incarceration. Treatment uptake is further dependent on inmate interest and clinical urgency  
13 (presence of advanced fibrosis or cirrhosis). ~~while~~ ~~T~~ treatment is postponed until release for  
14 inmates serving sentences shorter than treatment duration. ~~For the latter~~ Instead, outpatient  
15 follow-up appointments with HCV care providers are scheduled by Ministry of Health nurses  
16 prior to release.  
17  
18  
19  
20  
21  
22  
23  
24  
25  
26  
27  
28  
29  
30  
31  
32  
33  
34  
35  
36  
37

### 38 *Design*

39  
40 We conducted a retrospective study of all HCV-related laboratory tests requested by  
41 L'Établissement de Détention de Montréal inmates between July 1, 2017 and June 30, 2018. This  
42 time period was chosen following a transitional period in early 2017; thereafter, two Ministry of  
43 Health nurses with dedicated time to sexually transmitted and bloodborne infections screening  
44 were available. We conceptualized the cascade of HCV care as a continuum of eight steps (Table  
45 1): 1. Total sentenced inmates; 2. HCV screened; 3. HCV-antibody positive (indicative of  
46 previous exposure); 4. HCV RNA tested; 5. HCV RNA positive (indicative of chronic HCV  
47  
48  
49  
50  
51  
52  
53  
54  
55  
56  
57  
58  
59  
60

1  
2  
3 infection); 6. Linked to care; 7. Initiated on HCV treatment; and 8. Achieved sustained virologic  
4  
5 response (indicative of cure). The total number of sentenced inmates (step 1) during the study  
6  
7 period was 4931.<sup>20</sup> HCV screened (step 2) was defined as the number of inmates requesting on-  
8  
9 demand HCV screening (via an HCV antibody test) during the study period. HCV-antibody  
10  
11 positive (step 3) was defined as the number of inmates with at least one confirmed positive HCV  
12  
13 antibody test. HCV RNA tested (step 4) was defined as the number of HCV-antibody positive  
14  
15 inmates who had at least one HCV RNA test to confirm chronic HCV infection. We assumed  
16  
17 that any inmate who underwent HCV RNA testing as the first screening test was already known  
18  
19 to be exposed to HCV and thus also contributed data to steps 2 and 3. HCV RNA positive (step  
20  
21 5) was defined as the number of inmates with at least one confirmed positive HCV RNA test.  
22  
23  
24 Linkage to care (step 6) was defined as the number of inmates with chronic HCV infection who  
25  
26 were assessed by an off-site HCV care provider. Treatment initiation (step 7) was defined as the  
27  
28 number of inmates with chronic HCV infection who were started on HCV treatment during  
29  
30 incarceration. Achieved sustained virologic response (step 8) was defined as the number of  
31  
32 inmates who were HCV RNA negative 12 weeks following end of direct-acting antiviral  
33  
34 treatment.  
35  
36  
37  
38  
39  
40  
41  
42

#### 43 *Sources of data*

44 We obtained de-identified individual-level laboratory data for steps 2 to 5 from Sacré-Coeur  
45  
46 Hospital's Optilab information system. Data accuracy was verified by removing duplicates and  
47  
48 ensuring each individual had a unique identifier; in addition, data from re-incarcerated inmates  
49  
50 were considered to contribute to the cascade only once. -Ministry of Health nurses were then  
51  
52 provided with non-nominal identifiers to determine linkage, treatment initiation, and cure rates  
53  
54  
55  
56  
57  
58  
59  
60

1  
2  
3 (i.e. steps 6 to 8) using L'Établissement de Détention de Montréal prison health records. Due to  
4  
5 the highly confidential nature of inmate data, individual-level data was restricted to age and  
6  
7 HCV care parameters.  
8  
9

### 10 11 12 *Statistical analysis* 13

14 We calculated the proportion of inmates at each step of the HCV care cascade using  
15  
16 denominator-numerator linkage, whereby data is linked at the individual level within each step  
17  
18 and individuals eligible for being in the numerator in a given step are the same individuals in the  
19  
20 denominator of the subsequent step.<sup>21</sup> We subsequently calculated the proportion screened (step  
21  
22 2) among inmates sentenced for at least one month (estimated to be 40% of the total number of  
23  
24 sentenced inmates), during which time screening and confirmatory testing should be feasible.<sup>18</sup>  
25  
26

27 All analyses were performed in R-3.5.1.  
28  
29

### 30 31 32 33 *Ethics approval* 34

35 This study was approved by the Research Institute of the McGill University Health Centre  
36  
37 Research Ethics Board (MUHC 2019-5138) and by the Director of the Centre Intégré  
38  
39 Universitaire de Santé et de Services Sociaux du Nord-de-l'Île-de-Montréal.  
40  
41  
42  
43

## 44 **Results**

### 45 46 47 *Patient characteristics* 48

49 All inmates were male. The median age was 35 years.  
50  
51  
52

### 53 54 *HCV cascade of care* 55 56 57 58 59 60



1  
2  
3 Of the 4931 sentenced male inmates between July 2017 and June 2018, 344 (7%) were screened  
4 for HCV; 38 (11%) were HCV-antibody positive; 35 (92%) received HCV RNA testing; 16  
5  
6 (46%) were HCV RNA positive; 10 (63%) were linked to care; three (30%) were initiated on  
7  
8 treatment; and two (67%) achieved SVR (Figure 1a). Among the six who were not linked to care,  
9  
10 three refused while the other three were released prior to the scheduling of their HCV care  
11  
12 appointments. Among the seven who were not initiated on treatment, three were serving  
13  
14 sentences shorter than HCV treatment duration and were therefore denied therapy, two refused,  
15  
16 one was transferred to another correctional facility, and one died of a cause unrelated to HCV.  
17  
18 One inmate had not yet completed treatment and therefore had not met the timepoint for  
19  
20 sustained virologic response. Restricting the analysis to inmates sentenced for at least one month  
21  
22 (n=1972) increased the proportion of inmates screened for HCV to 17% ~~(Figure 1b)~~.  
23  
24  
25  
26  
27  
28  
29  
30

### 31 **Interpretation**

32  
33 ~~To our knowledge, this is the first study assessing the HCV cascade of care in a Canadian~~  
34 ~~provincial correctional facility.~~ Our study retrospectively identified that the major bottleneck for  
35  
36 engagement in HCV care for people-men incarcerated in a large Canadian provincial prison was  
37  
38 screening. We observed that screening rates were remarkably low (7%) in the presence of on-  
39  
40 demand screening, that the prevalence of HCV antibody positivity (11%) reflects recent  
41  
42 provincial biobehavioural studies, and that confirmatory HCV RNA tests were performed on the  
43  
44 majority (92%) of individuals with evidence of previous HCV exposure.<sup>22</sup> Conversely, only 10  
45  
46 and three inmates were linked to care and started on HCV treatment, respectively, during the  
47  
48 one-year study period. These low numbers likely reflect absent formalized HCV cure pathways  
49  
50 as well as deficient follow-up procedures of chronically infected inmates post-release,  
51  
52  
53  
54  
55  
56  
57  
58  
59  
60

1  
2  
3 shortcomings that are unlikely unique to L'Établissement de Détention de Montréal. Finally, the  
4 identified reasons for low linkage and treatment uptake included refusals, short sentences, and  
5  
6 prison transfers – all in keeping with other studies and representing unique challenges for HCV  
7  
8 care in prison settings.<sup>23, 24</sup>  
9  
10

11  
12 In order to improve HCV screening at L'Établissement de Détention de Montréal and in  
13 other Canadian provincial prisons, systematic opt-out screening should be considered a necessary  
14 first step.<sup>5</sup> Admission itself to any correctional facility provides an important public health  
15 opportunity to identify chronic HCV cases through screening, and as all distal cascade steps are  
16 dependent on this initial step, implementing systematic screening at admission and during  
17 incarceration is imperative.<sup>25</sup> Given that a sizeable proportion of incarcerated individuals have  
18 been previously exposed to HCV and are unaware of their status, this recommendation seems  
19 rational.<sup>22</sup> HCV screening rates in other Canadian provincial prisons are unknown. However,  
20 with the exception of British Columbia (where an opt-out screening approach is used), the  
21 majority of provincial correctional facilities provide testing only upon request, implying that  
22 similarly low screening rates would be expected in the remainder of Canadian provincial prisons.  
23  
24 Despite the low screening rates, with on-site nursing, as is available at L'Établissement de  
25  
26  
27  
28  
29  
30  
31  
32  
33  
34  
35  
36  
37  
38  
39  
40  
41  
42  
43  
44  
45  
46  
47  
48  
49  
50  
51  
52  
53  
54  
55  
56  
57  
58  
59  
60

10

1  
2  
3 approved in Canada, is able to diagnose active HCV infection in a single visit, with a turnaround  
4 time of one hour.<sup>27</sup> This is particularly relevant for correctional facilities whose inmates serve  
5 short sentences, as is the case in Canadian provincial/territorial prisons or American jails.  
6  
7  
8 Cognizant that provincial prisons' budgets are limited, our findings imply that continuing to  
9  
10 adopt on-demand screening approaches will fail to identify an important sub-population who  
11  
12 drive the current Canadian HCV epidemic and who are key to HCV micro-elimination.<sup>9</sup>  
13  
14  
15

16  
17 In order to improve engagement along the HCV care cascade, L'Établissement de  
18  
19 Détention de Montréal and other Canadian provincial prisons should explore strategies to  
20  
21 increase access to HCV treatment. Prioritizing the treatment of all provincial inmates who  
22  
23 remain in custody long enough to allow for the completion of direct-acting antiviral therapy is a  
24  
25 reasonable first step.<sup>15</sup> While this may represent a minority of individuals, this is a practical  
26  
27 approach owing to lower sustained virologic response rates among inmates who are initiated on  
28  
29 treatment but who are subsequently transferred or released.<sup>28</sup> We found that among those who  
30  
31 served sentences long enough to complete therapy, there remained a significant proportion of  
32  
33 individuals who refused to be assessed for or initiated on treatment. While refusals are not  
34  
35 uncommon in prison settings, a recent qualitative study demonstrated that adopting a patient-  
36  
37 centred treatment approach, whereby privacy is assured and social support is provided, may  
38  
39 enhance HCV treatment uptake among people in prisons.<sup>29</sup> In addition, correctional facilities  
40  
41 could facilitate linkage with on-site (rather than off-site) physicians or other qualified health care  
42  
43 personnel in order to reduce delays between diagnosis and treatment initiation. For the majority  
44  
45 who will not serve sufficiently long sentences, both ensuring receipt of any HCV care while  
46  
47 incarcerated and facilitating referral to an HCV care specialist through appointment scheduling  
48  
49 have been shown to improve linkage to care following release.<sup>26,30,31</sup> However, both would only  
50  
51  
52  
53  
54  
55  
56  
57  
58  
59  
60

1  
2  
3 be possible in the presence of dedicated and trained personnel, which again, may not always be  
4 the case in many correctional facilities. Furthermore, establishing corridors of service with  
5 primary or tertiary care centres would help ensure the availability of dedicated physicians and  
6 timely follow-up appointments. Canadian provincial prisons have generally provided very little  
7 support during the prison to community transitional period, and while primary care may be better  
8 suited to address some of these challenges, post-incarceration transition clinics have also  
9 emerged as models of care to address these specific barriers in a culturally appropriate  
10 manner.<sup>32,33</sup>

### 21 22 23 24 *Limitations*

25  
26 Our study has several limitations. First, the results of this study are limited to a single year at a  
27 single male provincial prison in Quebec. As such, the results may only be generalizable to other  
28 Canadian provincial prisons with both on-demand HCV screening and nursing personnel  
29 dedicated to HCV care. Our results may also not be generalizable to female or mixed-gender  
30 provincial prisons. Adding additional sites would have unlikely changed results due to similar  
31 screening protocols (i.e. on demand) in other Quebec provincial prisons. Secondly, as sentence  
32 durations were unknown, we may have underestimated the proportion progressing along the  
33 HCV care cascade solely as a result of short sentences. While we attempted to address this  
34 limitation with our secondary analysis, whereby we ensured sufficient sentence duration to allow  
35 for screening, this was impossible to do for cascade steps distal to HCV RNA positivity (i.e.  
36 linkage to care, treatment initiation and sustained virologic response). Therefore, right censoring  
37 of the data is expected without this consideration. Future cascade work could investigate the role  
38 of sentence duration on cascade reporting, allowing for more accurate documentation of  
39  
40  
41  
42  
43  
44  
45  
46  
47  
48  
49  
50  
51  
52  
53  
54  
55  
56  
57  
58  
59  
60

1  
2  
3 improvements to HCV care engagement among inmates over time. Finally, while we used  
4 individual-level data, we were unable to better understand progression (or lack thereof) along the  
5 HCV care cascade based on sociodemographic information or liver disease status due to  
6 restrictions on inmate data. This limitation underscores the unique challenges that exist when  
7 conducting scientifically rigorous research in correctional settings, and helps advocate for  
8 improved transparency with health research and research ethics in prisons.  
9  
10  
11  
12  
13  
14  
15  
16  
17  
18

### 19 *Conclusion*

20  
21 We found substantial missed opportunities for HCV care engagement for inmates in Quebec's  
22 largest provincial prison in the presence of an on-demand screening strategy and despite  
23 dedicated nursing services. Correctional Service Canada has taken monumental steps towards the  
24 micro-elimination of HCV in federal facilities through systematic screening and universal access  
25 to HCV treatment; however, similar provincial commitments have lagged, likely driven by short  
26 sentences and high turnover rates. While prison settings represent unique environments for the  
27 initiation of HCV care, failing to adopt systematic opt-out screening as a first step, as was done  
28 in federal facilities, may not only have important individual-level health outcomes, but  
29 consequences for Canada's public health. Moving forward, we must engage with all relevant  
30 stakeholders, from policymakers to community, in order to prioritize people in provincial prisons  
31 in the national HCV elimination agenda.  
32  
33  
34  
35  
36  
37  
38  
39  
40  
41  
42  
43  
44  
45  
46  
47  
48  
49  
50  
51  
52  
53  
54  
55  
56  
57  
58  
59  
60

## References

1. Myers RP, Liu M, Shaheen AA. The burden of hepatitis C virus infection is growing: a Canadian population-based study of hospitalizations from 1994 to 2004. *Can J Gastroenterol*. 2008;22:381-7.
2. Myers RP, Krajden M, Bilodeau M, et al. Burden of disease and cost of chronic hepatitis C infection in Canada. *Can J Gastroenterol Hepatol*. 2014;28:243-50.
3. Schanzer DL, Paquette D, Lix LM. Historical trends and projected hospital admissions for chronic hepatitis C infection in Canada: a birth cohort analysis. *CMAJ Open*. 2014;2:E139-44.
4. Kwong JC, Ratnasingham S, Campitelli MA, et al. The impact of infection on population health: results of the Ontario burden of infectious diseases study. *PLoS One*. 2012;7(9):e44103.
5. Kronfli N, Nitulescu R, Cox J, et al. Decreased hepatitis C treatment uptake among HIV-HCV co-infected patients with a history of incarceration. *JIAS*. 2018;21(11):e25197.
6. Trubnikov M, Yan P, Archibald C. Estimated prevalence of Hepatitis C Virus infection in Canada, 2011. Public Health Agency of Canada. *CCDR*: Volume 40-19, December 18, 2014 [cited 14 April 2019]. Available from: <http://www.phac-aspc.gc.ca/publicat/ccdr-rmtc/14vol40/dr-rm40-19/surveillance-b-eng.php>
7. Challacombe L. The epidemiology of hepatitis C in Canada. *CATIE*. 2017 [cited 14 April 2019]. Available from: <http://www.catie.ca/en/fact-sheets/epidemiology/epidemiology-hepatitis-c-canada>

- 1  
2  
3 8. Kronfli N, Cox J. Care for people with hepatitis C in provincial and territorial prisons.  
4  
5 CMAJ. 2018; 190(4): E93-E4.  
6  
7
- 8 9. Kronfli N, Buxton J, Jennings L, et al. Hepatitis C virus (HCV) care in Canadian  
9  
10 correctional facilities: Where are we and where do we need to be? Can Liv J. Advance  
11  
12 Online 2019-0007 : 1-13.  
13  
14
- 15 10. World Health Organization. Combating hepatitis B and C to reach elimination by 2030 -  
16  
17 Advocay brief. Geneva, Switzerland: World Health Organization. 2016 [cited 14 April  
18  
19 2019]. Available from: [https://www.who.int/hepatitis/publications/hep-elimination-by-  
20  
21 2030-brief/en/](https://www.who.int/hepatitis/publications/hep-elimination-by-2030-brief/en/)  
22  
23
- 24 11. Hill AM, Nath S, Simmons B. The road to elimination of hepatitis C: analysis of cures  
25  
26 versus new infections in 91 countries. J Virus Erad. 2017; 3(3): 117-23.  
27  
28
- 29 12. Linas BP, Barter DM, Leff JA, et al. The hepatitis C cascade of care: identifying  
30  
31 priorities to improve clinical outcomes. PLoS One. 2014;9:e97317.  
32  
33
- 34 13. Grad R, Thombs BD, Tonelli M, et al. Recommendations on hepatitis C screening for  
35  
36 adults. CMAJ 2017;189(16):E594-E604.  
37  
38
- 39 14. Shah H, Bilodeau M, Burak KW, et al. The management of chronic hepatitis C: 2018  
40  
41 guideline update from the Canadian Association for the Study of the Liver. CMAJ  
42  
43 2018;190(22):E677-E87.  
44  
45
- 46 15. The Canadian Network on Hepatitis C Blueprint Writing Committee and Working  
47  
48 Groups. Blueprint to inform hepatitis C elimination efforts in Canada. Montreal, QC.  
49  
50 May 2019. [cited 6 august 2019]. Available from:  
51  
52 [http://www.canhepc.ca/sites/default/files/media/documents/ blueprint\\_hcv\\_2019\\_05.pdf](http://www.canhepc.ca/sites/default/files/media/documents/blueprint_hcv_2019_05.pdf)  
53  
54  
55  
56  
57  
58  
59  
60

- 1  
2  
3  
4  
5  
6  
7  
8  
9  
10  
11  
12  
13  
14  
15  
16  
17  
18  
19  
20  
21  
22  
23  
24  
25  
26  
27  
28  
29  
30  
31  
32  
33  
34  
35  
36  
37  
38  
39  
40  
41  
42  
43  
44  
45  
46  
47  
48  
49  
50  
51  
52  
53  
54  
55  
56  
57  
58  
59  
60
16. World Health Organization. Guidelines for the screening, care and treatment of persons with chronic hepatitis C infection. 2016 [updated April 2016]. Available from: <https://www.who.int/hepatitis/publications/hepatitis-c-guidelines-2016/en/>
  17. Webster P. Dramatic budget increase for hepatitis treatment in federal prisons. CMAJ. 2017;189:E1052.
  18. Reitano J. Adult correctional statistics in Canada, 2015/2016 [juristat]. Ottawa: Statistics Canada. 2017 [cited 14 April 2019]. Available from: [www.statcan.gc.ca/pub/85-002-x/2017001/article/14700-eng.pdf](http://www.statcan.gc.ca/pub/85-002-x/2017001/article/14700-eng.pdf)
  19. Ministère de la sécurité publique. Direction générale des services correctionnels. La capacité d'accueil, le taux d'occupation, les coûts per diem, les dépenses et les crédits alloués pour chaque établissement de détention pour la période 2015-2016. 2016 [cited 14 April 2019]. Available from: [https://www.securitepublique.gouv.qc.ca/fileadmin/Documents/ministere/diffusion/documents\\_transmis\\_acces/2016/119707.pdf](https://www.securitepublique.gouv.qc.ca/fileadmin/Documents/ministere/diffusion/documents_transmis_acces/2016/119707.pdf)
  20. Infocentre correctionnel. *StatInfo mensuel 2017-2018*. Direction générale des services correctionnels, Ministère de la Sécurité Publique (unpublished report).
  21. Haber N, Pillay D, Porter K, Barnighausen T. Constructing the cascade of HIV care: methods for measurement. *Curr Opin HIVAIDS* 2016;11(1):102-8.
  22. Courtemanche Y, Poulin C, Serhir B, Alary M. Étude de prévalence du VIH et du VHC chez les personnes incarcérées dans les établissements de détention provinciaux au Québec. Institut national de santé publique du Québec. 2016. [https://www.inspq.qc.ca/sites/default/files/documents/itss/rapport\\_vih\\_vhc\\_milieu\\_carcer\\_al.pdf](https://www.inspq.qc.ca/sites/default/files/documents/itss/rapport_vih_vhc_milieu_carcer_al.pdf)



- 1  
2  
3 23. Yap, L., Carruthers, S., Thompson, S., Cheng, W., Jones, J., Simpson, P., et al. (2014). A  
4  
5 descriptive model of patient readiness, motivators, and hepatitis C treatment uptake  
6  
7 among Australian prisoners. *PLoS One*, 9(2), e87564.  
8  
9
- 10 24. Vroling H, Oordt-Speets AM, Madeddu G, et al. A systematic review on models of care  
11  
12 effectiveness and barriers to Hepatitis C treatment in prison settings in the EU/EEA. *J*  
13  
14 *Viral Hepat.* 2018; 25(12):1406-1422.  
15  
16
- 17 25. He T, Li K, Roberts MS, et al. Prevention of Hepatitis C by Screening and Treatment in  
18  
19 U.S. Prisons. *Ann Intern Med* 2016;164(2):84-92.  
20  
21
- 22 26. Kronfli N, Linthwaite B, Kouyoumdjian F, et al. Interventions to increase testing, linkage  
23  
24 to care and treatment of hepatitis C virus (HCV) infection among people in prisons: A  
25  
26 systematic review. *IJDP* 2018;57:95-103.  
27  
28
- 29 27. Lamoury FMJ, Bajis S, Hajarizadeh B, et al. Evaluation of the Xpert HCV Viral Load  
30  
31 Finger-Stick Point-of-Care Assay. *J Infect Dis* 2018;217(12):1889-1896.  
32  
33
- 34 28. Aspinall EJ, Mitchell W, Schofield J, Cairns A, Lamond S, Bramley P, et al. A matched  
35  
36 comparison study of hepatitis C treatment outcomes in the prison and community setting,  
37  
38 and an analysis of the impact of prison release or transfer during therapy. *J Viral Hepat.*  
39  
40 2016;23:1009–16.  
41  
42
- 43 29. Lafferty L, Rance J, Grebely J, et al. Understanding facilitators and barriers of direct-  
44  
45 acting antiviral therapy for hepatitis C virus infection in prison. *J Viral Hepat.*  
46  
47 2018;25(12):1526-1532.  
48  
49
- 50 30. Hochstatter KR, Stockman LJ, Holzmacher R, Greer J, Seal DW, Taylor QA, et al. The  
51  
52 continuum of hepatitis C care for criminal justice involved adults in the DAA era: a  
53  
54  
55  
56  
57  
58  
59  
60

1  
2  
3 retrospective cohort study demonstrating limited treatment uptake and inconsistent  
4 linkage to community-based care. *Health Justice*. 2017;5(1):10.  
5  
6

- 7  
8 31. Tait, J. M., McIntyre, P. G., McLeod, S., Nathwani, D., & Dillon, J. F. (2010). The  
9 impact of a managed care network on attendance, follow-up and treatment at a hepatitis C  
10 specialist centre. *Journal of Viral Hepatitis*, 17(10), 698–704.  
11  
12  
13  
14 32. Wang E, Hong CS, Samuels L, Shavit S, Sanders R, Kushel M. Transitions clinic:  
15 creating a community-based model of health care for recently released California  
16 prisoners. *Public Health Rep*. 2010;125:171–7.  
17  
18  
19  
20  
21 33. Hawks L, Norton BL, Cunningham CO, Fox AD. The hepatitis C virus treatment cascade  
22 at an urban postincarceration transitions clinic. *J Viral Hepat*. 2016;23(6):473–8.  
23  
24  
25  
26  
27  
28  
29  
30  
31  
32  
33  
34  
35  
36  
37  
38  
39  
40  
41  
42  
43  
44  
45  
46  
47  
48  
49  
50  
51  
52  
53  
54  
55  
56  
57  
58  
59  
60

**Table 1: Steps of the Hepatitis C virus (HCV) care cascade**

| <b>Cascade step</b>                      | <b>Definition</b>                                                                                     |
|------------------------------------------|-------------------------------------------------------------------------------------------------------|
| 1. Total sentenced inmates               | Total number of sentenced inmates during the study period                                             |
| 2. HCV screened                          | Number of inmates requesting on-demand HCV screening (via an HCV antibody test)                       |
| 3. HCV-antibody positive                 | Number of inmates with at least one confirmed positive HCV antibody test                              |
| 4. HCV RNA tested                        | Number of HCV-antibody positive inmates with at least one HCV RNA test                                |
| 5. HCV RNA positive                      | Number of inmates with at least one confirmed positive HCV RNA test, indicating chronic HCV infection |
| 6. Linked to care                        | Number of inmates who were assessed by an off-site HCV care provider                                  |
| 7. Initiated on HCV treatment            | Number of inmates who were started on HCV treatment during incarceration                              |
| 8. Achieved sustained virologic response | Number of inmates who were HCV RNA negative 12 weeks following end of treatment, indicating cure      |

1  
2  
3  
4  
5  
6  
7  
8  
9  
10  
11  
12  
13  
14  
15  
16  
17  
18  
19  
20  
21  
22  
23  
24  
25  
26  
27  
28  
29  
30  
31  
32  
33  
34  
35  
36  
37  
38  
39  
40  
41  
42  
43  
44  
45  
46  
47  
48  
49  
50  
51  
52  
53  
54  
55  
56  
57  
58  
59  
60

**Figure 1: Hepatitis C virus cascade of care among all sentenced inmates (a) and among those sentenced for at least one month (b)**

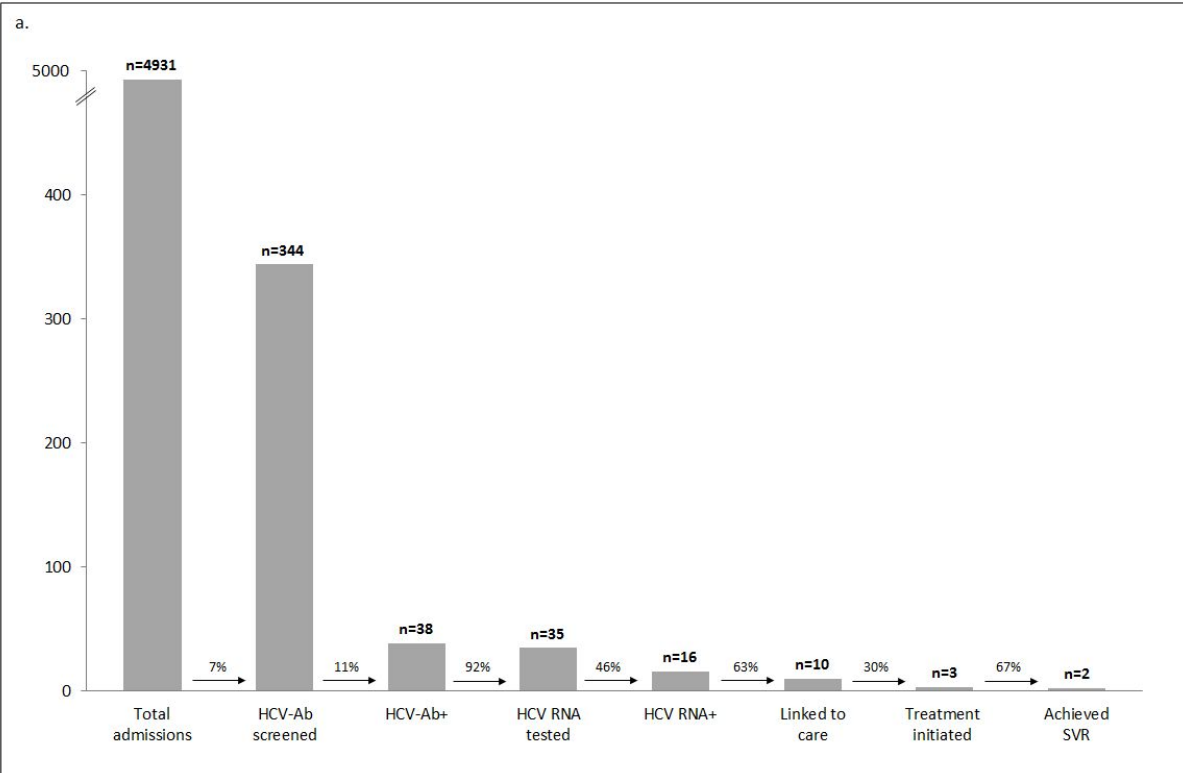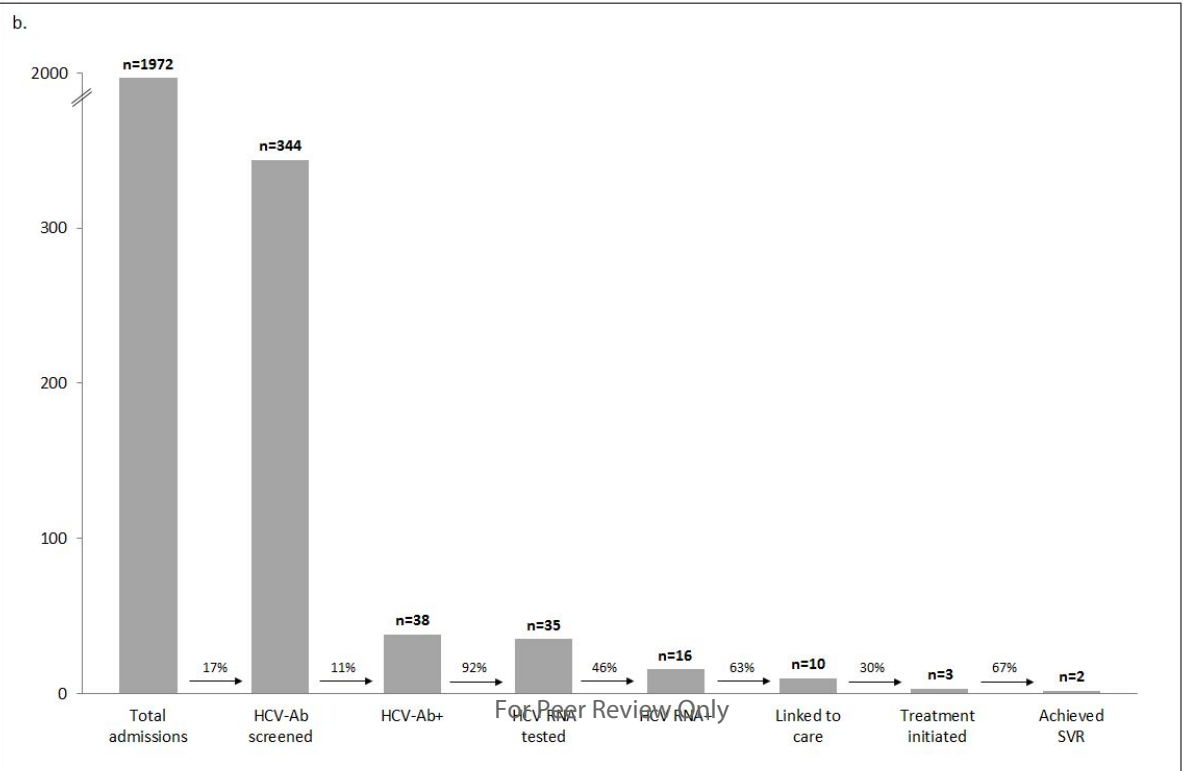

## Contributors

Nadine Kronfli, Camille Dussault and Joseph Cox were involved in study conceptualization and design. Nadine Kronfli and Camille Dussault analyzed and interpreted the data. Nadine Kronfli drafted the manuscript. Nadine Kronfli, Camille Dussault, Marina Klein, Bertrand Lebouché, Giada Sebastiani and Joseph Cox critically revised the manuscript for important intellectual content. All of the authors gave final approval of the version to be published and agreed to be accountable for all aspects of the work.

## Funding

Bertrand Lebouché received salary support from Fonds de la Recherche en Santé du Québec (FRQS) and Fédération des médecins omnipraticiens du Québec. Giada Sebastiani received salary support from Fonds de la Recherche en Santé du Québec (FRQS).

## Acknowledgements

We would like to acknowledge and thank Martin Boily, Nathalie Perreault, Joëlle Bianco, and Helene Rodrigue for their assistance with data collection.
